# Supplementary material
Source: MDPI journal article supplement (https://www.mdpi.com/1661-3821/3/2/21)
Supplement: s1 [file s1]

## Kidney Injury Molecule -1 (KIM-1) as synonym of Hepatitis A virus cellular receptor 1 (HAVcr-1)

**Summary**

**Symbol** **Havcr1**

**Name** hepatitis A virus cellular receptor 1

**Synonyms** KIM-1, Tim1, TIM-1

**Feature Type** protein coding gene

**IDs** MGI:2159680  
NCBI Gene: 171283

**Alliance** [gene page](#)

**Transcription Start Sites** 9 TSS

**Location & Maps** [more](#)

**Sequence Map** Chr11:46630644-46670405 bp, + strand  
From NCBI annotation of GRCm39

**Genetic Map** Chromosome 11, 28.08 cM

**Strain Comparison** [more](#)

**SNPs within 2kb** 294 from dbSNP Build 142

**Strain Annotations** 18

**Homology** [more](#)

**Human Ortholog** HAVCR1, hepatitis A virus cellular receptor 1

**Vertebrate Orthologs** 3

**Human Diseases** [more](#)

**Diseases** 1 with human HAVCR1 associations

**Mutations, Alleles, and Phenotypes** [less](#)

**Phenotype Summary** 20 phenotypes from 3 alleles in 4 genetic backgrounds  
16 phenotypes from multigenic genotypes  
25 phenotype references

**All Mutations and Alleles** 11

Chemically induced (other) 1

Endonuclease-mediated 4

Targeted 6

**Genomic Mutations** 1 involving Havcr1

**Incidental Mutations** [Mutagenetix](#), [APF](#)

**Find Mice (IMSR)** 23 strains or lines available

**Comparison Matrix** [Gene Expression + Phenotype](#)

**Phenotype Overview**

## Supplementary Table S1: Information for genes of interest for RT-qPCR

| Gene names                                    | Abbreviation    | Sequences                                                       | Gene's function          |
|-----------------------------------------------|-----------------|-----------------------------------------------------------------|--------------------------|
| Interleukin-6                                 | IL-6            | F: AAGAAATGATGGATGCTACC<br>R:<br>GAGTTTCTGTATCTCTCTGAAG         | Pro-inflammatory markers |
| Tumor Necrosis Factor                         | TNF- $\alpha$   | F: CTATGTCTCAGCCTCTTCTC<br>R: CATTTGGGAACCTTCTCATCC             |                          |
| Kidney Injury Molecule 1                      | KIM-1 or HAVCR1 | F: TACTCCTACAGACTGGAATG<br>R: AGTATGTACCTGGTGATAGC              | Kidney injury marker     |
| Purinergic Receptor P2Y, G-Protein Coupled, 1 | P2RY1           | F: TTGTAACATGGTCACAAGAC<br>R: AGGTGTCTTTCAACAAAACG              | Purinceptor              |
| Glyceraldehyde-3-Phosphate Dehydrogenase      | GAPDH           | F:<br>CATCACTGCCACCCAGAAGACTG<br>R:<br>ATGCCAGTGAGCTTCCCGTTTCAG | House-keeping gene       |

## Supplementation: Amplification curves for target genes

### GAPDH

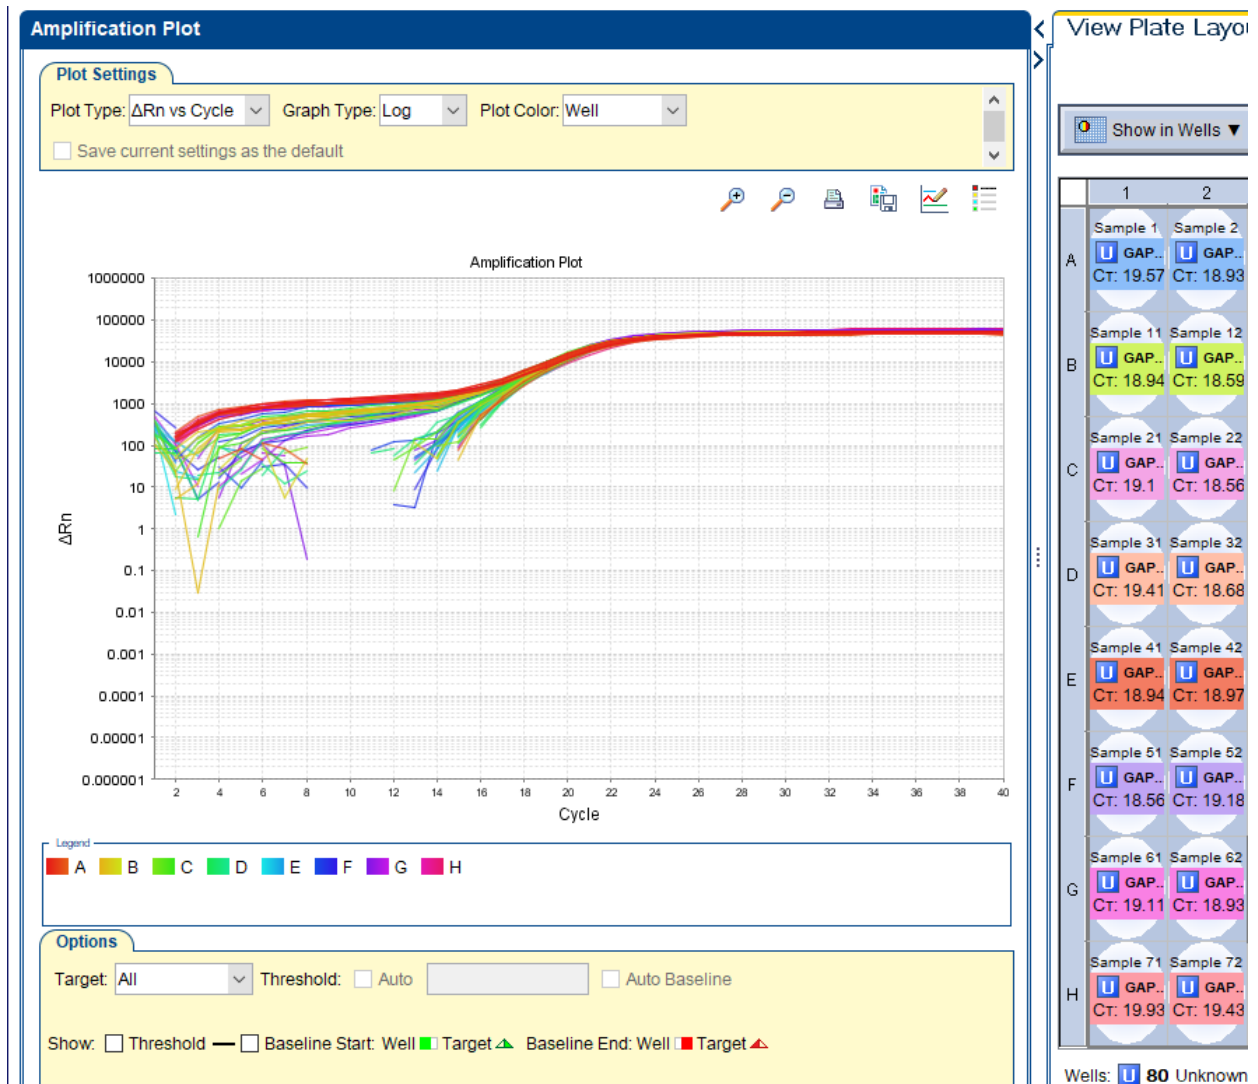

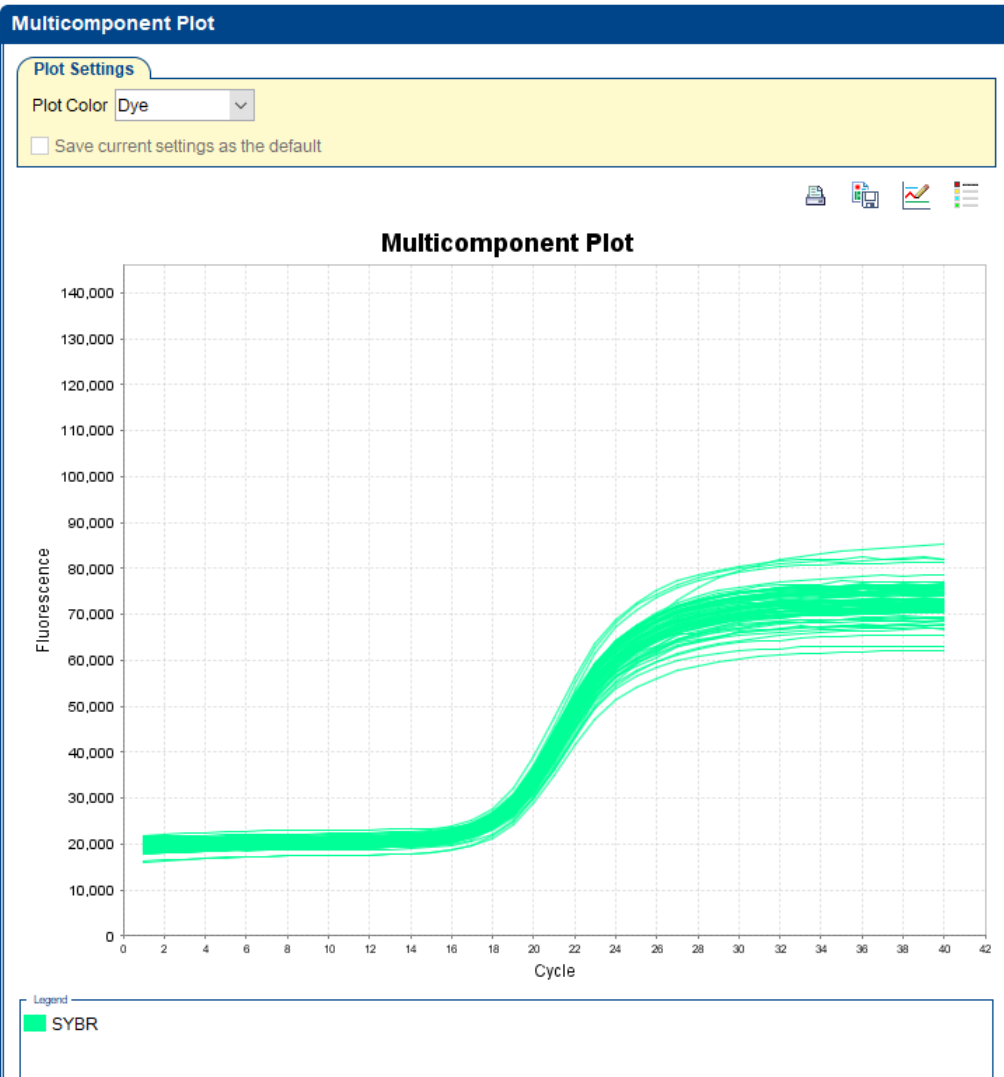

View Plate Layout

Show in Wells

|   | 1                              | 2                              |
|---|--------------------------------|--------------------------------|
| A | Sample 1<br>U GAP.. Ct: 19.57  | Sample 2<br>U GAP.. Ct: 18.93  |
| B | Sample 11<br>U GAP.. Ct: 18.94 | Sample 12<br>U GAP.. Ct: 18.59 |
| C | Sample 21<br>U GAP.. Ct: 19.1  | Sample 22<br>U GAP.. Ct: 18.56 |
| D | Sample 31<br>U GAP.. Ct: 19.41 | Sample 32<br>U GAP.. Ct: 18.68 |
| E | Sample 41<br>U GAP.. Ct: 18.94 | Sample 42<br>U GAP.. Ct: 18.97 |
| F | Sample 51<br>U GAP.. Ct: 18.56 | Sample 52<br>U GAP.. Ct: 19.18 |
| G | Sample 61<br>U GAP.. Ct: 19.11 | Sample 62<br>U GAP.. Ct: 18.93 |
| H | Sample 71<br>U GAP.. Ct: 19.93 | Sample 72<br>U GAP.. Ct: 19.43 |

Wells: U 80 Unknown

# Multiple Plots View

## Amplification Plot - $\Delta Rn$ vs Cycle

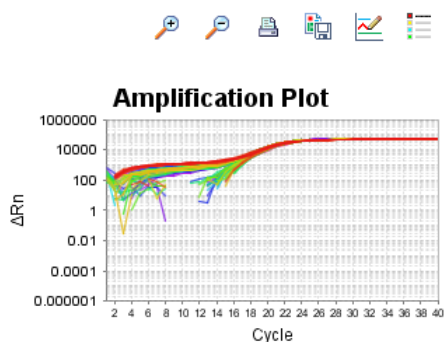

Legend

A B C D  
E F G H

## Amplification Plot - Rn vs Cycle

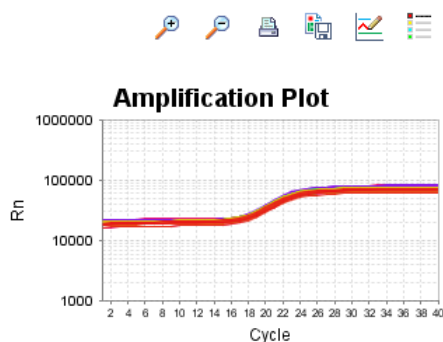

Legend

A B C D  
E F G H

## Multicomponent Plot

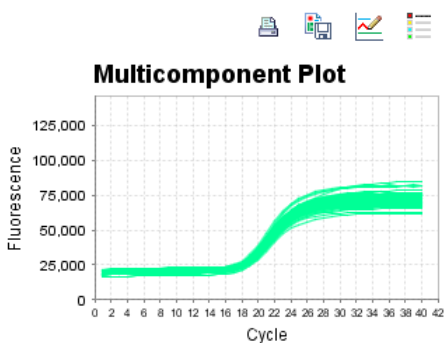

Legend

SYBR

## Raw Data Plot

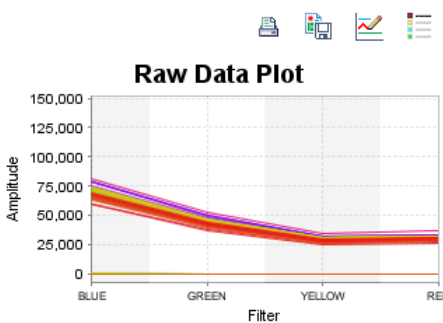

Legend

A B C D  
E F G H

# View Plate Layout

Show in Wells

|   | 1                                 | 2                                 |
|---|-----------------------------------|-----------------------------------|
| A | Sample 1<br>U GAP..<br>Ct: 19.57  | Sample 2<br>U GAP..<br>Ct: 18.93  |
| B | Sample 11<br>U GAP..<br>Ct: 18.94 | Sample 12<br>U GAP..<br>Ct: 18.59 |
| C | Sample 21<br>U GAP..<br>Ct: 19.1  | Sample 22<br>U GAP..<br>Ct: 18.56 |
| D | Sample 31<br>U GAP..<br>Ct: 19.41 | Sample 32<br>U GAP..<br>Ct: 18.68 |
| E | Sample 41<br>U GAP..<br>Ct: 18.94 | Sample 42<br>U GAP..<br>Ct: 18.97 |
| F | Sample 51<br>U GAP..<br>Ct: 18.56 | Sample 52<br>U GAP..<br>Ct: 19.18 |
| G | Sample 61<br>U GAP..<br>Ct: 19.11 | Sample 62<br>U GAP..<br>Ct: 18.93 |
| H | Sample 71<br>U GAP..<br>Ct: 19.93 | Sample 72<br>U GAP..<br>Ct: 19.43 |

Wells: U 80 Unknown

# HAVCR1 or KIM1

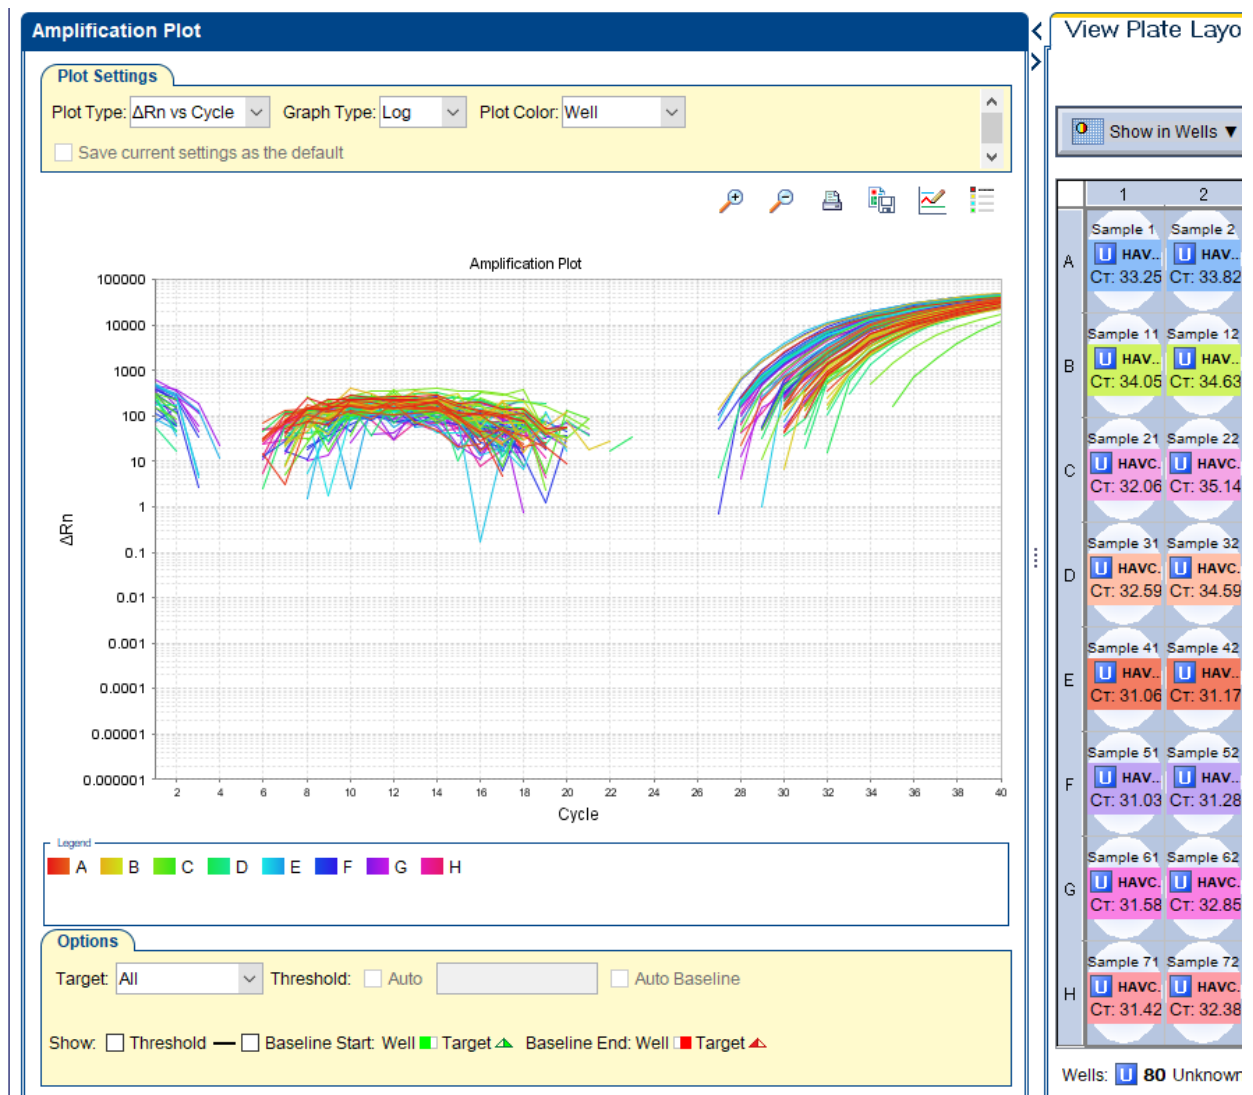

# Multicomponent Plot

## Plot Settings

Plot Color Dye

☐ Save current settings as the default

## Multicomponent Plot

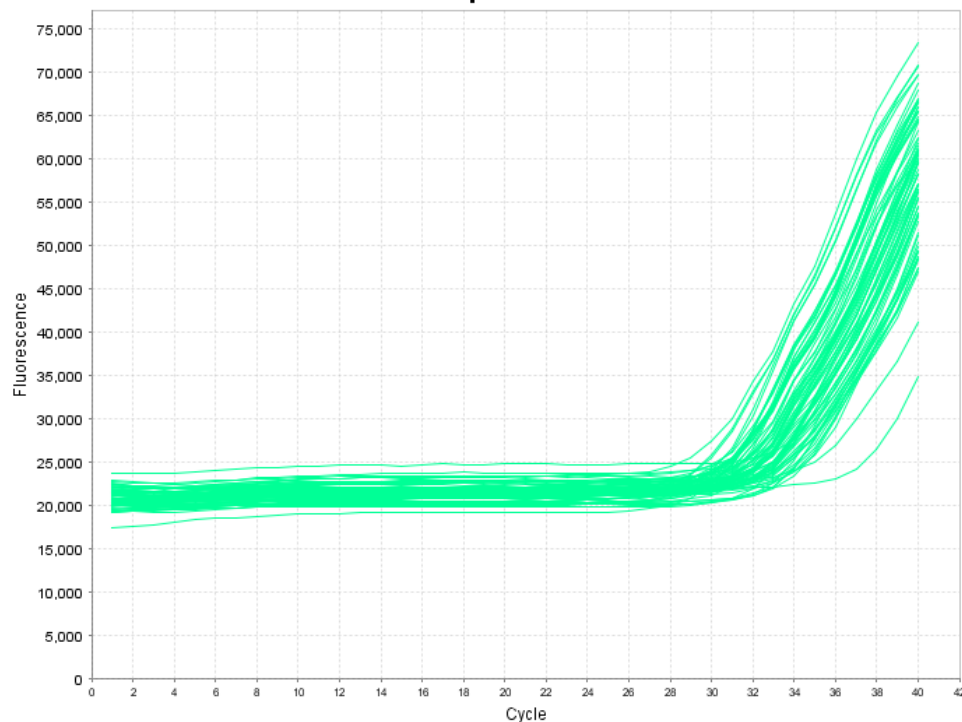

Legend  
SYBR

## View Plate Layout

☒ Show in Wells

|   | 1                                 | 2                                 |
|---|-----------------------------------|-----------------------------------|
| A | Sample 1<br>U HAV..<br>Ct: 33.25  | Sample 2<br>U HAV..<br>Ct: 33.82  |
| B | Sample 11<br>U HAV..<br>Ct: 34.05 | Sample 12<br>U HAV..<br>Ct: 34.63 |
| C | Sample 21<br>U HAVC.<br>Ct: 32.06 | Sample 22<br>U HAVC.<br>Ct: 35.14 |
| D | Sample 31<br>U HAVC.<br>Ct: 32.59 | Sample 32<br>U HAVC.<br>Ct: 34.59 |
| E | Sample 41<br>U HAV..<br>Ct: 31.06 | Sample 42<br>U HAV..<br>Ct: 31.17 |
| F | Sample 51<br>U HAV..<br>Ct: 31.03 | Sample 52<br>U HAV..<br>Ct: 31.28 |
| G | Sample 61<br>U HAVC.<br>Ct: 31.58 | Sample 62<br>U HAVC.<br>Ct: 32.85 |
| H | Sample 71<br>U HAVC.<br>Ct: 31.42 | Sample 72<br>U HAVC.<br>Ct: 32.38 |

Wells: **U 80** Unknown

# IL6

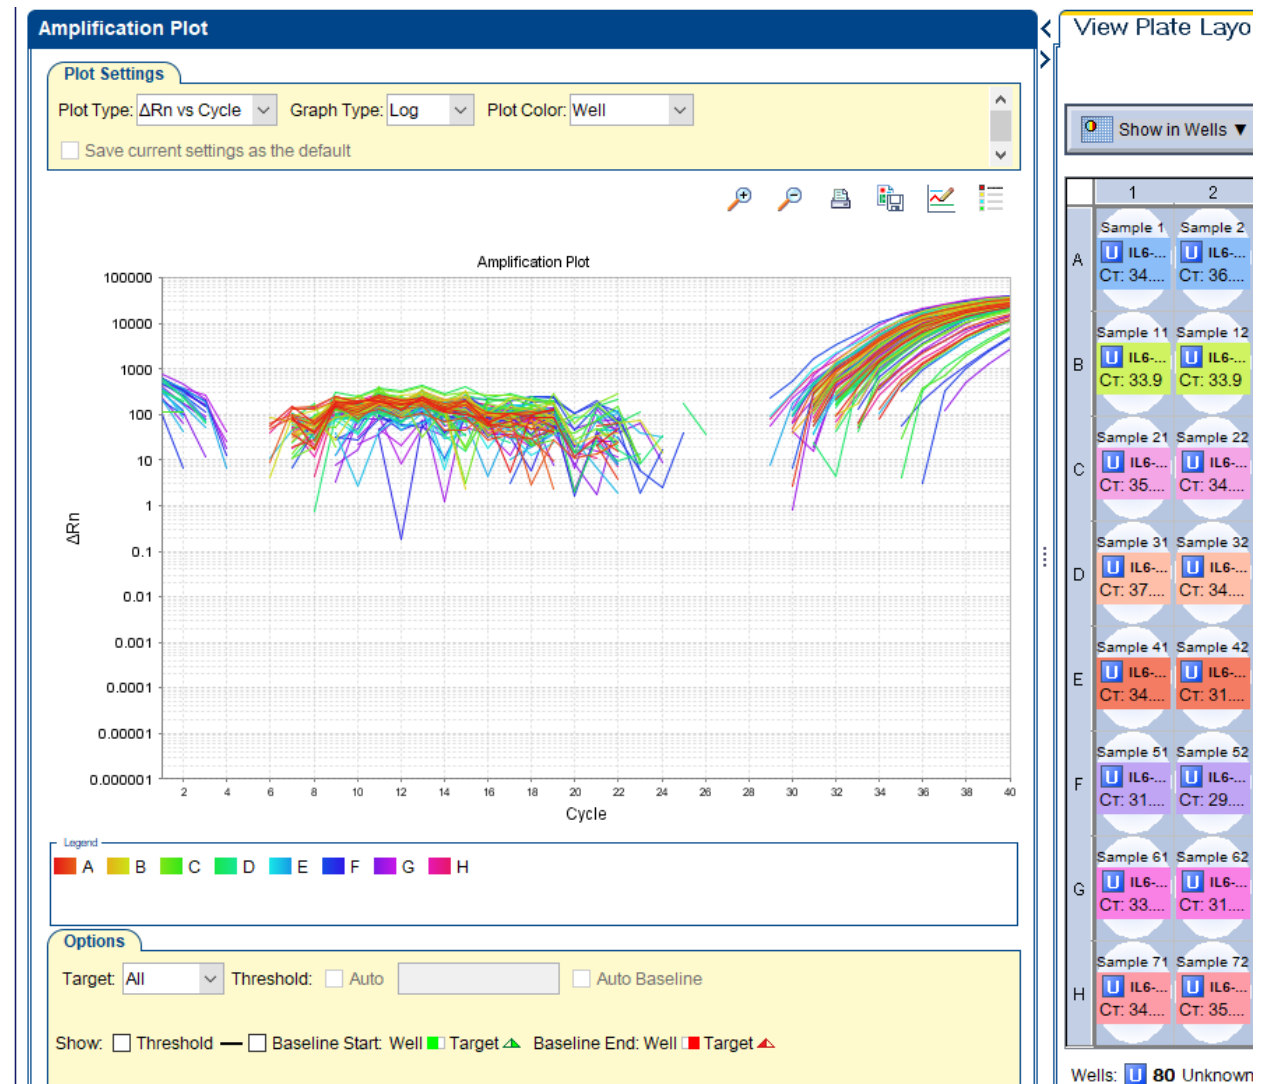

# Multicomponent Plot

## Plot Settings

Plot Color Dye

☐ Save current settings as the default

## Multicomponent Plot

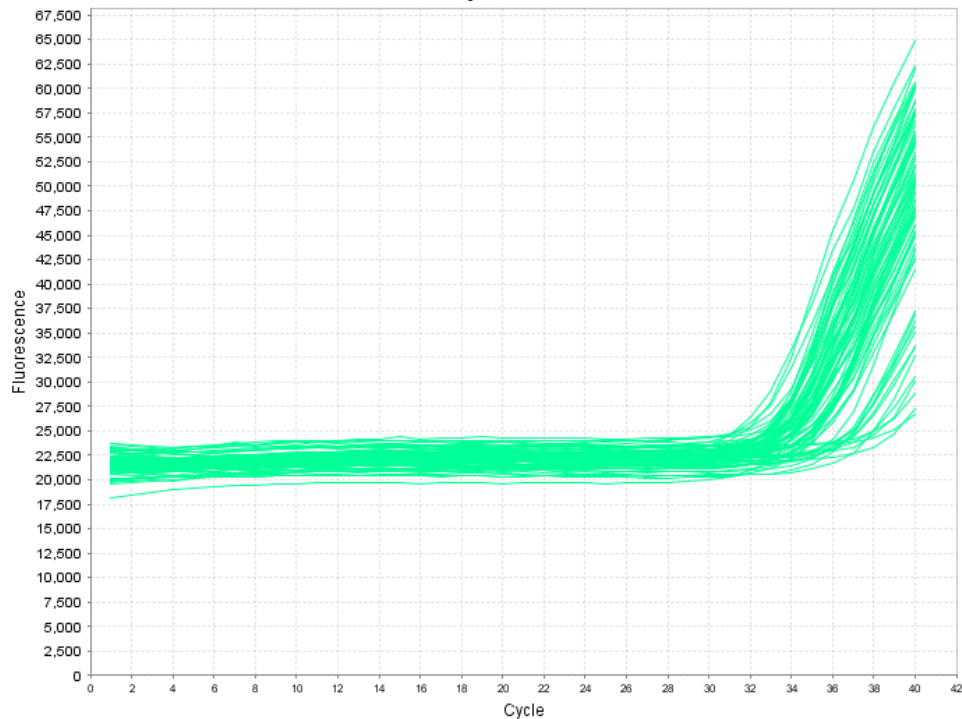

Legend  
SYBR

## View Plate Layout

☒ Show in Wells

|   | 1                                    | 2                                    |
|---|--------------------------------------|--------------------------------------|
| A | Sample 1<br>U IL6-...<br>Ct: 34....  | Sample 2<br>U IL6-...<br>Ct: 36....  |
|   | Sample 11<br>U IL6-...<br>Ct: 33.9   | Sample 12<br>U IL6-...<br>Ct: 33.9   |
| B | Sample 21<br>U IL6-...<br>Ct: 35.... | Sample 22<br>U IL6-...<br>Ct: 34.... |
|   | Sample 31<br>U IL6-...<br>Ct: 37.... | Sample 32<br>U IL6-...<br>Ct: 34.... |
| C | Sample 41<br>U IL6-...<br>Ct: 34.... | Sample 42<br>U IL6-...<br>Ct: 31.... |
|   | Sample 51<br>U IL6-...<br>Ct: 31.... | Sample 52<br>U IL6-...<br>Ct: 29.... |
| D | Sample 61<br>U IL6-...<br>Ct: 33.... | Sample 62<br>U IL6-...<br>Ct: 31.... |
|   | Sample 71<br>U IL6-...<br>Ct: 34.... | Sample 72<br>U IL6-...<br>Ct: 35.... |
| E |                                      |                                      |
|   |                                      |                                      |
| F |                                      |                                      |
|   |                                      |                                      |
| G |                                      |                                      |
|   |                                      |                                      |
| H |                                      |                                      |
|   |                                      |                                      |

Wells: **U** 80 Unknown



# Multiple Plots View

Amplification Plot -  $\Delta Rn$  vs Cycle

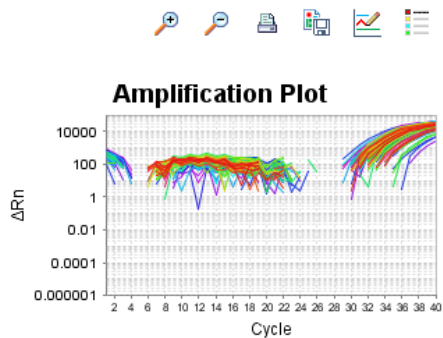

Amplification Plot -  $Rn$  vs Cycle

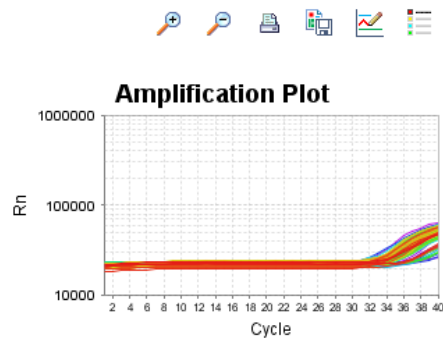

Multicomponent Plot

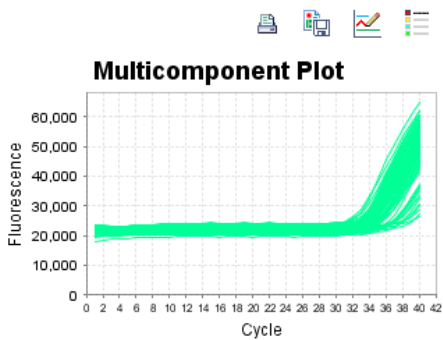

Raw Data Plot

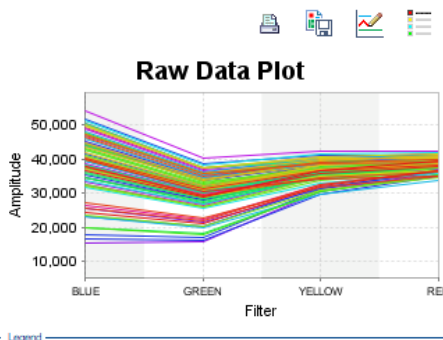

## View Plate Layout

Show in Wells

|   | 1                                    | 2                                    |
|---|--------------------------------------|--------------------------------------|
| A | Sample 1<br>U IL6-...<br>Ct: 34....  | Sample 2<br>U IL6-...<br>Ct: 36....  |
| B | Sample 11<br>U IL6-...<br>Ct: 33.9   | Sample 12<br>U IL6-...<br>Ct: 33.9   |
| C | Sample 21<br>U IL6-...<br>Ct: 35.... | Sample 22<br>U IL6-...<br>Ct: 34.... |
| D | Sample 31<br>U IL6-...<br>Ct: 37.... | Sample 32<br>U IL6-...<br>Ct: 34.... |
| E | Sample 41<br>U IL6-...<br>Ct: 34.... | Sample 42<br>U IL6-...<br>Ct: 31.... |
| F | Sample 51<br>U IL6-...<br>Ct: 31.... | Sample 52<br>U IL6-...<br>Ct: 29.... |
| G | Sample 61<br>U IL6-...<br>Ct: 33.... | Sample 62<br>U IL6-...<br>Ct: 31.... |
| H | Sample 71<br>U IL6-...<br>Ct: 34.... | Sample 72<br>U IL6-...<br>Ct: 35.... |

Wells: U 80 Unknown

P2RY1

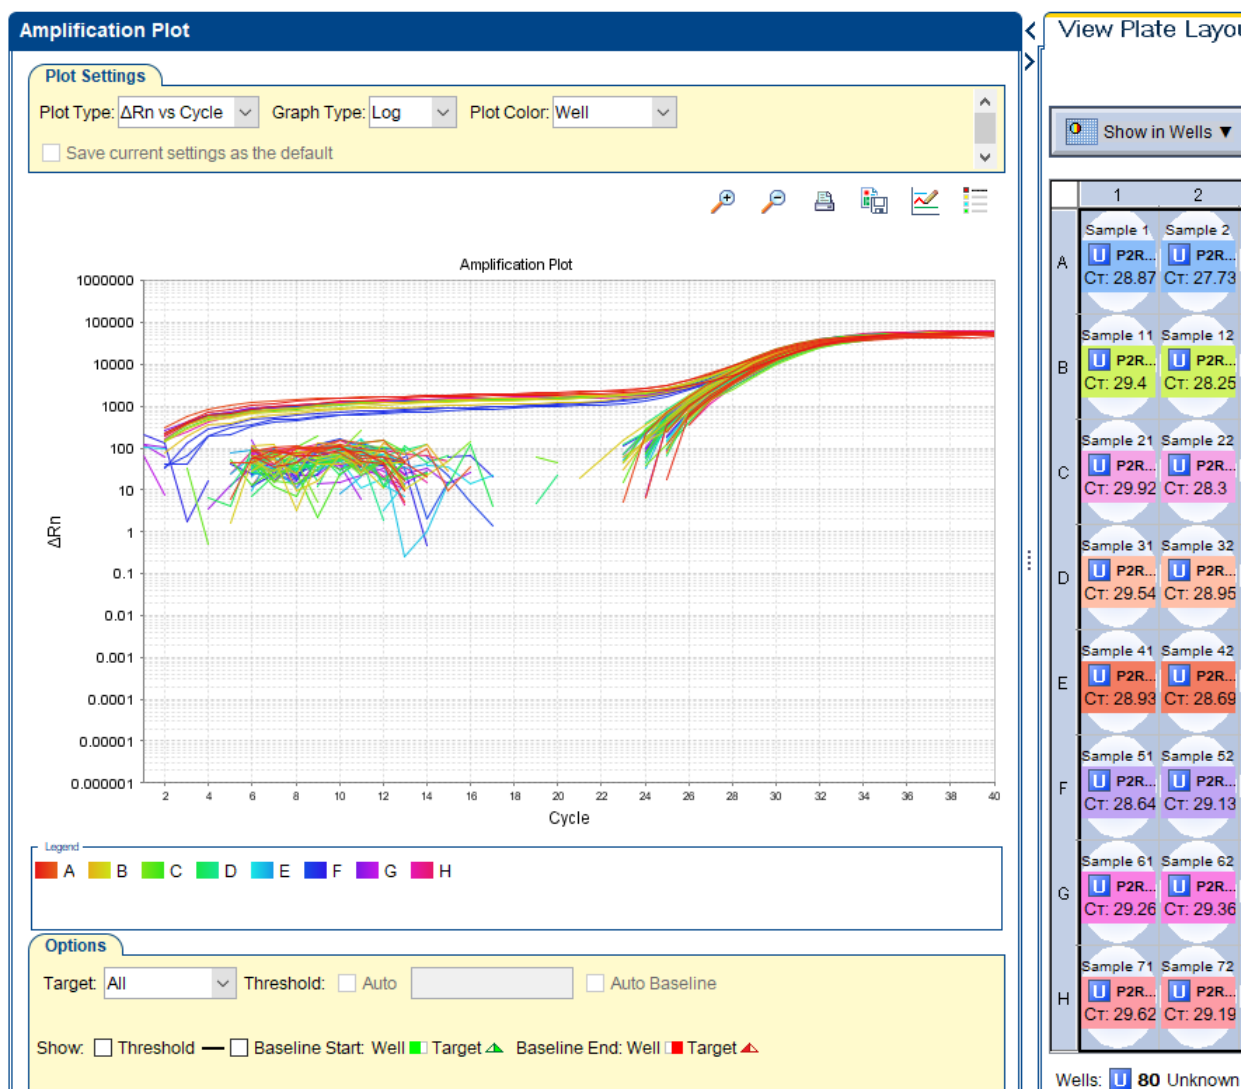

# Multicomponent Plot

## Plot Settings

Plot Color Dye

☐ Save current settings as the default

## Multicomponent Plot

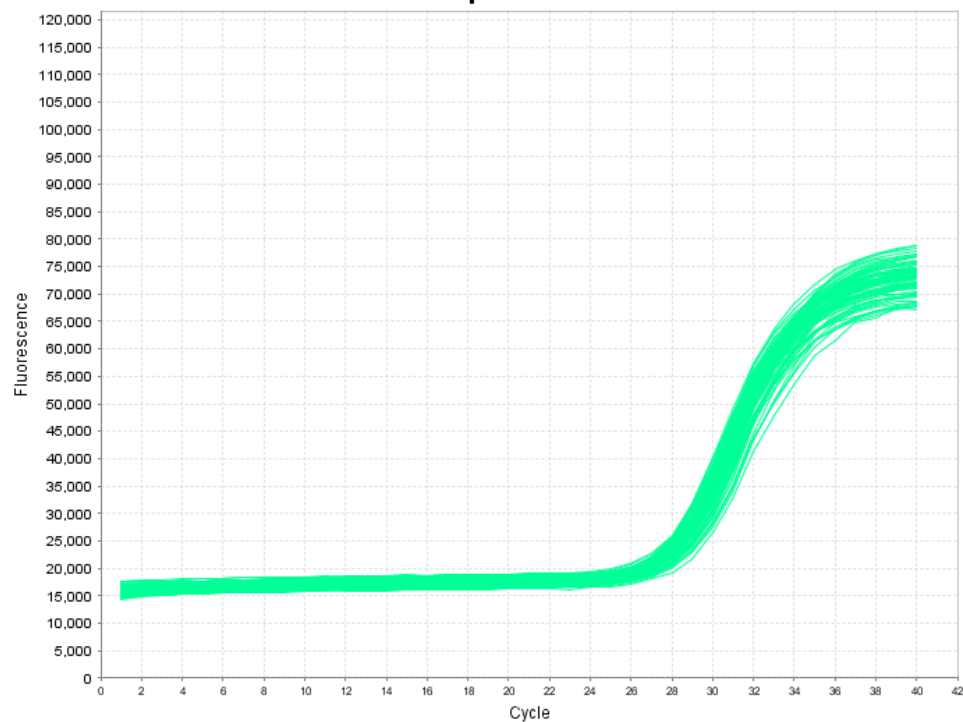

Legend

■ SYBR

## View Plate Layout

Show in Wells

|   | 1                                               | 2                                               |
|---|-------------------------------------------------|-------------------------------------------------|
| A | Sample 1<br><span>U</span> P2R...<br>Ct: 28.87  | Sample 2<br><span>U</span> P2R...<br>Ct: 27.73  |
| B | Sample 11<br><span>U</span> P2R...<br>Ct: 29.4  | Sample 12<br><span>U</span> P2R...<br>Ct: 28.25 |
| C | Sample 21<br><span>U</span> P2R...<br>Ct: 29.92 | Sample 22<br><span>U</span> P2R...<br>Ct: 28.3  |
| D | Sample 31<br><span>U</span> P2R...<br>Ct: 29.54 | Sample 32<br><span>U</span> P2R...<br>Ct: 28.95 |
| E | Sample 41<br><span>U</span> P2R...<br>Ct: 28.93 | Sample 42<br><span>U</span> P2R...<br>Ct: 28.69 |
| F | Sample 51<br><span>U</span> P2R...<br>Ct: 28.64 | Sample 52<br><span>U</span> P2R...<br>Ct: 29.13 |
| G | Sample 61<br><span>U</span> P2R...<br>Ct: 29.26 | Sample 62<br><span>U</span> P2R...<br>Ct: 29.36 |
| H | Sample 71<br><span>U</span> P2R...<br>Ct: 29.62 | Sample 72<br><span>U</span> P2R...<br>Ct: 29.19 |

Wells: U 80 Unknown

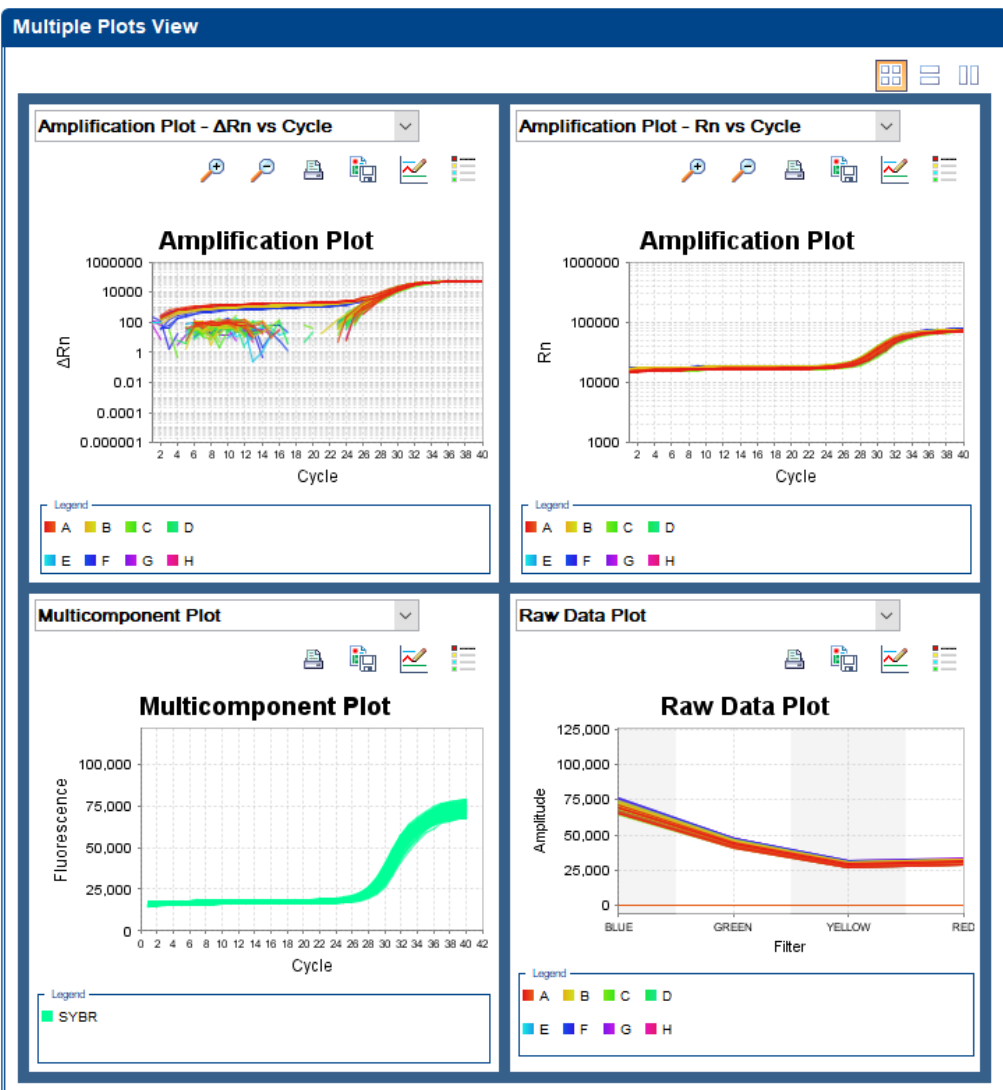

View Plate Layout

Show in Wells

|   | 1                                  | 2                                  |
|---|------------------------------------|------------------------------------|
| A | Sample 1<br>U P2R...<br>Ct: 28.87  | Sample 2<br>U P2R...<br>Ct: 27.73  |
| B | Sample 11<br>U P2R...<br>Ct: 29.4  | Sample 12<br>U P2R...<br>Ct: 28.25 |
| C | Sample 21<br>U P2R...<br>Ct: 29.92 | Sample 22<br>U P2R...<br>Ct: 28.3  |
| D | Sample 31<br>U P2R...<br>Ct: 29.54 | Sample 32<br>U P2R...<br>Ct: 28.95 |
| E | Sample 41<br>U P2R...<br>Ct: 28.93 | Sample 42<br>U P2R...<br>Ct: 28.69 |
| F | Sample 51<br>U P2R...<br>Ct: 28.64 | Sample 52<br>U P2R...<br>Ct: 29.13 |
| G | Sample 61<br>U P2R...<br>Ct: 29.26 | Sample 62<br>U P2R...<br>Ct: 29.36 |
| H | Sample 71<br>U P2R...<br>Ct: 29.62 | Sample 72<br>U P2R...<br>Ct: 29.19 |

Wells: U 80 Unknown

# TNF- $\alpha$

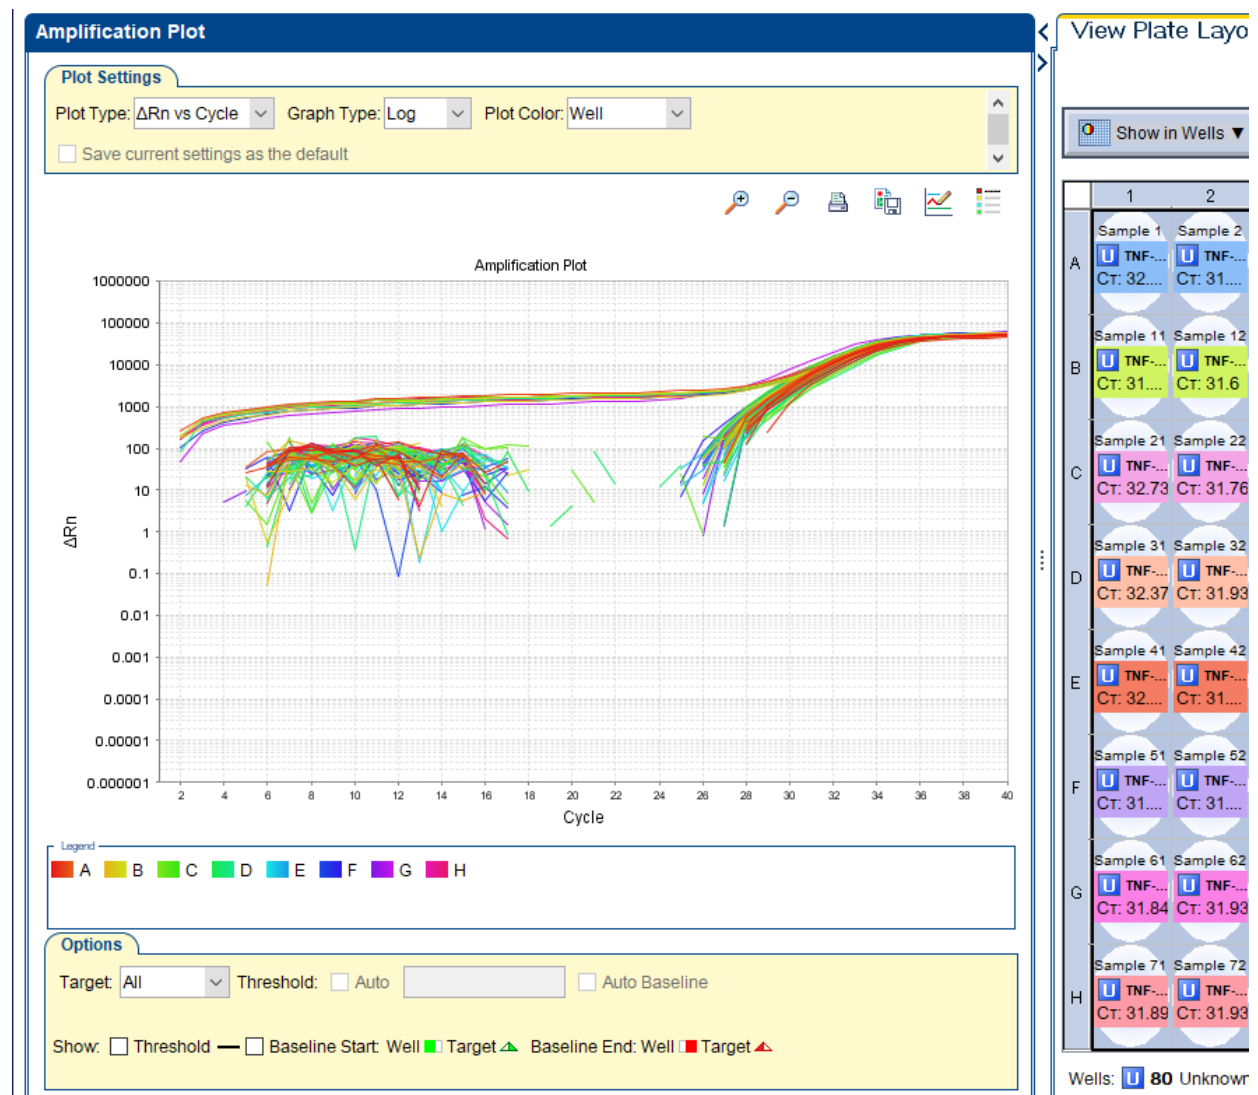

# Multicomponent Plot

## Plot Settings

Plot Color: Dye

☐ Save current settings as the default

## Multicomponent Plot

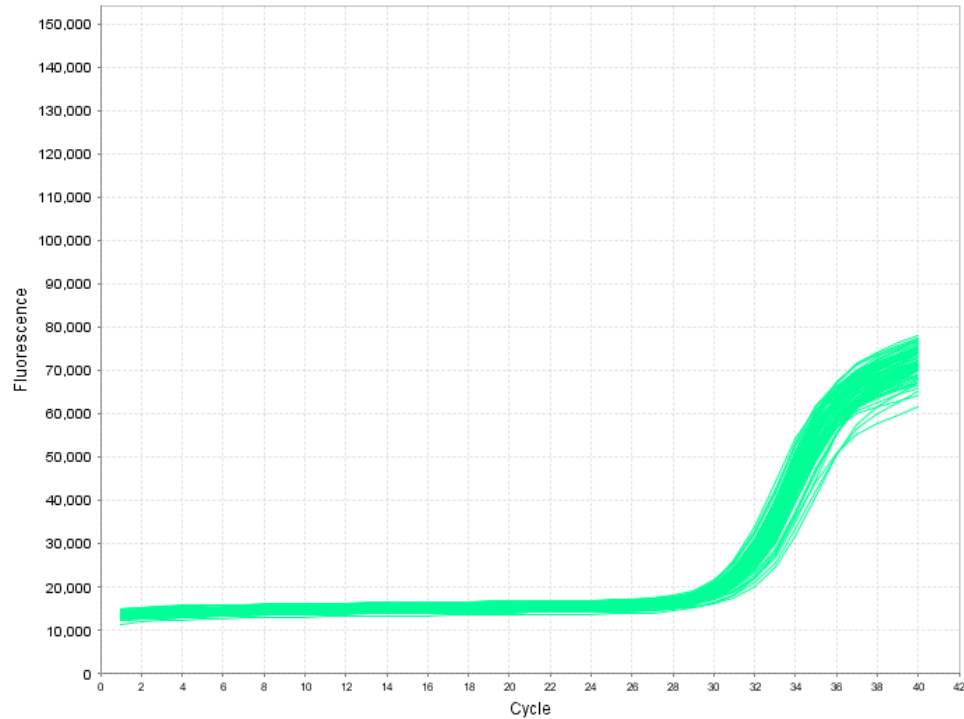

Legend

■ SYBR

## View Plate Layout

Show in Wells ▼

|   | 1                                    | 2                                    |
|---|--------------------------------------|--------------------------------------|
| A | Sample 1<br>U TNF-...<br>Ct: 32....  | Sample 2<br>U TNF-...<br>Ct: 31....  |
| B | Sample 11<br>U TNF-...<br>Ct: 31.... | Sample 12<br>U TNF-...<br>Ct: 31.6   |
| C | Sample 21<br>U TNF-...<br>Ct: 32.73  | Sample 22<br>U TNF-...<br>Ct: 31.76  |
| D | Sample 31<br>U TNF-...<br>Ct: 32.37  | Sample 32<br>U TNF-...<br>Ct: 31.93  |
| E | Sample 41<br>U TNF-...<br>Ct: 32.... | Sample 42<br>U TNF-...<br>Ct: 31.... |
| F | Sample 51<br>U TNF-...<br>Ct: 31.... | Sample 52<br>U TNF-...<br>Ct: 31.... |
| G | Sample 61<br>U TNF-...<br>Ct: 31.84  | Sample 62<br>U TNF-...<br>Ct: 31.93  |
| H | Sample 71<br>U TNF-...<br>Ct: 31.89  | Sample 72<br>U TNF-...<br>Ct: 31.93  |

Wells: U 80 Unknown

# Multiple Plots View

## Amplification Plot - $\Delta Rn$ vs Cycle

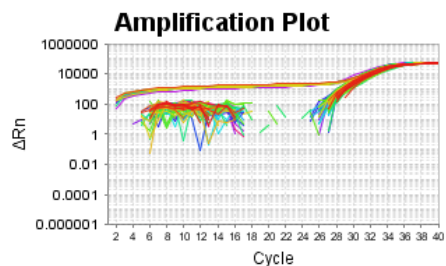

Legend

A B C D  
E F G H

## Amplification Plot - Rn vs Cycle

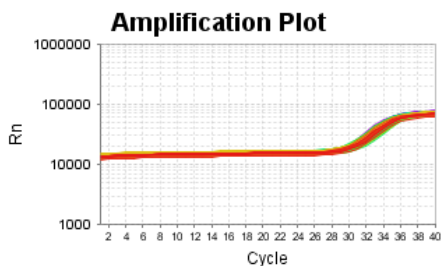

Legend

A B C D  
E F G H

## Multicomponent Plot

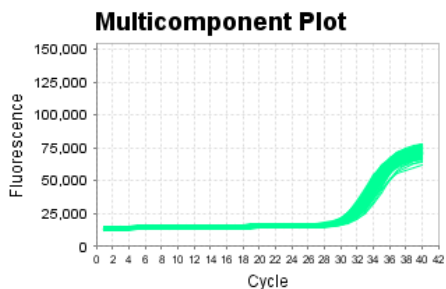

Legend

SYBR

## Raw Data Plot

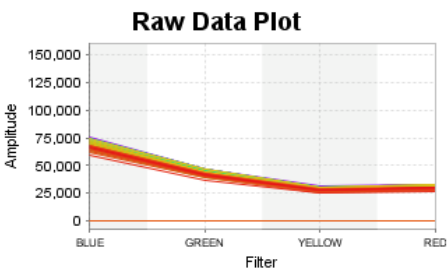

Legend

A B C D  
E F G H

# View Plate Layout

Show in Wells

|   | 1                                    | 2                                    |
|---|--------------------------------------|--------------------------------------|
| A | Sample 1<br>U TNF-...<br>Ct: 32....  | Sample 2<br>U TNF-...<br>Ct: 31....  |
| B | Sample 11<br>U TNF-...<br>Ct: 31.... | Sample 12<br>U TNF-...<br>Ct: 31.6   |
| C | Sample 21<br>U TNF-...<br>Ct: 32.73  | Sample 22<br>U TNF-...<br>Ct: 31.76  |
| D | Sample 31<br>U TNF-...<br>Ct: 32.37  | Sample 32<br>U TNF-...<br>Ct: 31.93  |
| E | Sample 41<br>U TNF-...<br>Ct: 32.... | Sample 42<br>U TNF-...<br>Ct: 31.... |
| F | Sample 51<br>U TNF-...<br>Ct: 31.... | Sample 52<br>U TNF-...<br>Ct: 31.... |
| G | Sample 61<br>U TNF-...<br>Ct: 31.84  | Sample 62<br>U TNF-...<br>Ct: 31.93  |
| H | Sample 71<br>U TNF-...<br>Ct: 31.89  | Sample 72<br>U TNF-...<br>Ct: 31.93  |

Wells: U 80 Unknown
